# Supplementary material for: Microglial-specific depletion of TAK1 is neuroprotective in the acute phase after ischemic stroke
Source: PubMed Central journal article supplement (PMC7297861; doi:10.1007/s00109-020-01916-9), 2020-05-07

**A**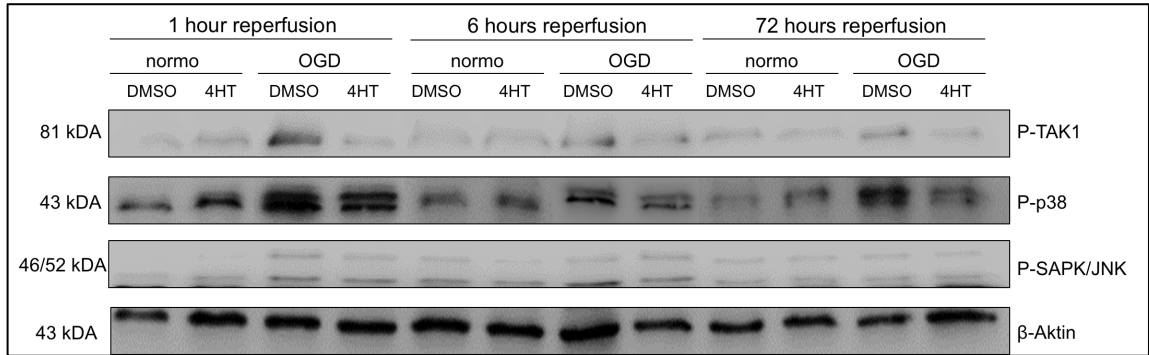**B**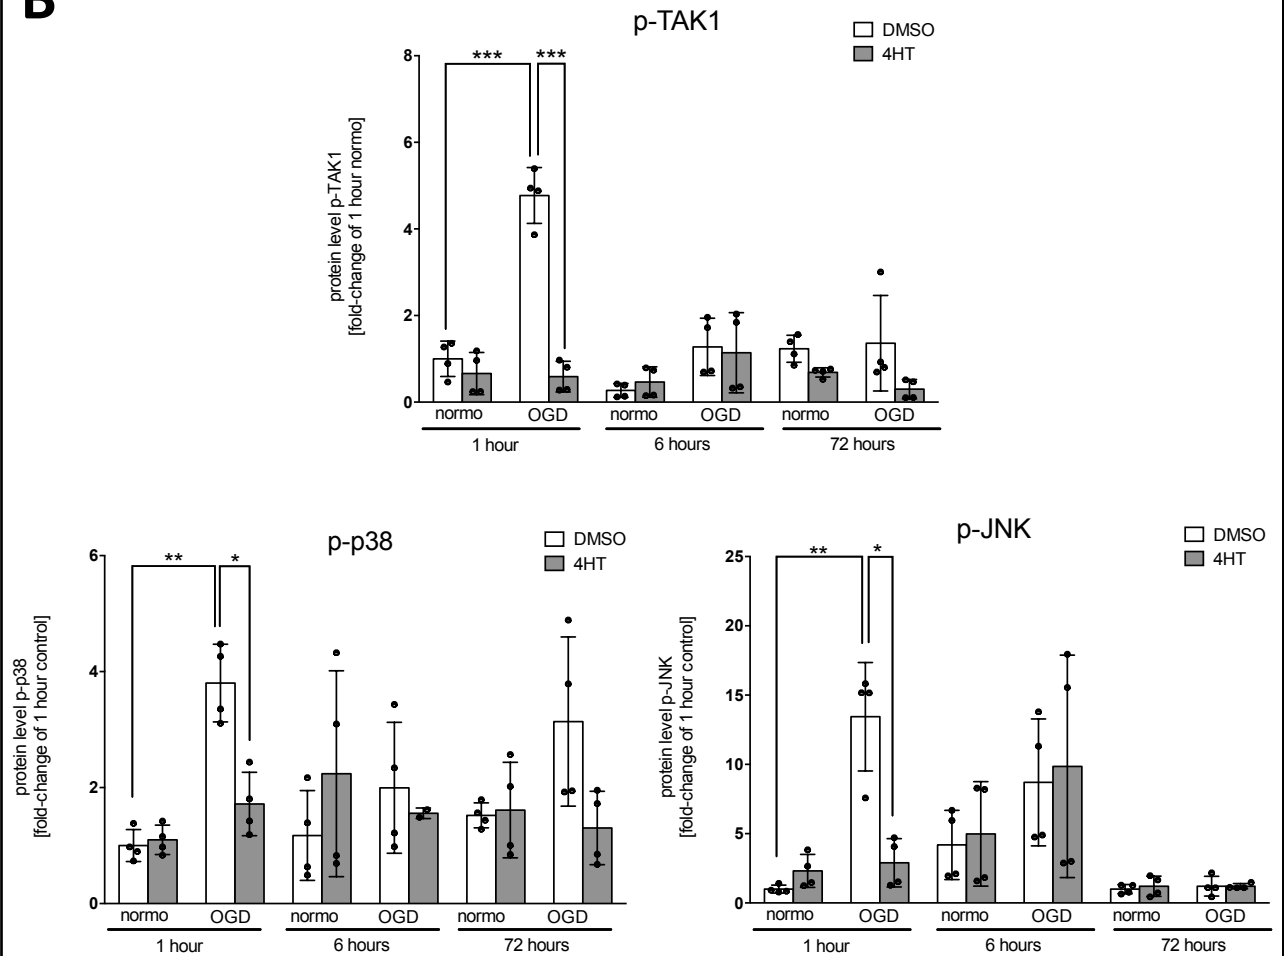

Supplement: 109_2020_1916_MOESM8_ESM.pdf [file 109_2020_1916_MOESM8_ESM.pdf]
